# Supplementary material for: Age-associated changes in microglia activation and Sirtuin-1- chromatin binding patterns
Source: Aging (Albany NY). 2022 Oct 10;14(20):8205–20. doi: 10.18632/aging.204329 (PMC9648798; doi:10.18632/aging.204329)
Supplement: Supplementary Material Module 2 [file aging-14-204329-s002.xlsx]

## Sheet: Supplementary 2 Module_0_2 defa
Supplementary Material Module 2. Gene network 01, with detectable Sirt1 binding and fold changes between shorter and longer-lived PFC, as in Figure 6B.
SUID	2_s2_SIV_Sirt1_Rh::1 AvgPeak	2_s2_SIV_Sirt1_Rh::1 Present	4_s4_OLD_Sirt1_Rh::1 AvgPeak	4_s4_OLD_Sirt1_Rh::1 Present	5_s5_208_Sirt1_Rh::1 AvgPeak	5_s5_208_Sirt1_Rh::1 Present	6_Input_overlap::1 AvgPeak	6_Input_overlap::1 Present	ActRegCount	Affy Tag	Altsymbols	annotation name	annotations	Chromosome	Ensembl Gene ID	Ensembl Protein ID	Entrez Gene ID	Full Description	Gene End	Gene ID	Gene Length	gene name	Gene Start	Gene Strand	Interval Dists to Start	Interval Pos	IntervalCount	Intervals	log score	name	node type	OLD CTR/YOUNG CTR	OLD/YOUNG SIV	Peak Sample	Peak Value	PROT	RefSeq mRNA ID	RefSeq Protein ID	RNA	score	selected	shared name	Synonym	UCSC Link	Uniprot ID	YOUNG SIV/YOUNG CTR
102	4	0	15	1	2	0	4	0	1	MmugDNA.27363.1.S1_at				15	ENSG00000122729	ENSP00000438733	48	aconitase 1	"44,843,255"	GeneID:705075	"68,676"	ACO1	"44,774,579"	-	-9	upstream	1	4_s4_OLD_Sirt1_Rh::1::106	-0.282167	H__sapiens__1_-706288	query	7.5	3.75	4_s4_OLD_Sirt1_Rh::1	15	XP_001103761	NM_002197	NP_002188	XM_001103761	0.754148	FALSE	H__sapiens__1_-706288	IRP1	Gene ACO1	P21399	2
394	5	0	25	1	5	0	8	0	1	"Mmu.289.1.S1_at, MmugDNA.24824.1.S1_at, MmugDNA.43579.1.S1_at"				5	ENSG00000163644	ENSP00000477341	152926	"protein phosphatase, Mg2+/Mn2+ dependent, 1K"	"81,245,615"	GeneID:702398	"22,654"	PPM1K	"81,222,961"	-	783	in gene	1	4_s4_OLD_Sirt1_Rh::1::246	-0.106214	H__sapiens__1_-712083	query	5	5	4_s4_OLD_Sirt1_Rh::1	25	"XP_001100043, XP_001100402"	NM_152542	NP_689755	"XM_001100043, XM_001100402"	0.899232	FALSE	H__sapiens__1_-712083	PP2Cm	Gene PPM1K	Q8N3J5	1
178	3	0	13	1	3	0	4	0	1					3	ENSG00000196584	ENSP00000352271	7516	X-ray repair complementing defective repair in Chinese hamster cells 2	"189,628,081"	GeneID:717006	"31,986"	XRCC2	"189,596,095"	-	-63	upstream	1	4_s4_OLD_Sirt1_Rh::1::225	-0.29722	H__sapiens__1_-718182	query	4.33	4.33	4_s4_OLD_Sirt1_Rh::1	13	XP_001108141	NM_005431	NP_005422	XM_001108141	0.742881	FALSE	H__sapiens__1_-718182		Gene XRCC2	O43543	1
302	5	0	12	1	3	0	1	0	1	MmunewRS.498.1.S1_at				7	ENSG00000157483	ENSP00000454113	4643	myosin IE	"37,683,302"	GeneID:100429961	"175,978"	MYO1E	"37,507,324"	-	23846	in gene	1	4_s4_OLD_Sirt1_Rh::1::268	-0.356768	H__sapiens__1_-711102	query	4	2.4	4_s4_OLD_Sirt1_Rh::1	12	XP_002804857	NM_004998	NP_004989	XM_002804811	0.699935	FALSE	H__sapiens__1_-711102	MGC104638	Gene MYO1E	Q12965	1.67
106	9	0	15	1	4	0	4	0	1					15	ENSG00000119138	ENSP00000366330	687	Kruppel-like factor 9	"79,183,913"	GeneID:700585	"31,121"	KLF9	"79,152,792"	-	-5175	upstream	1	4_s4_OLD_Sirt1_Rh::1::111	-0.289839	H__sapiens__1_-705859	query	3.75	1.67	4_s4_OLD_Sirt1_Rh::1	15	XP_001094875	NM_001206	NP_001197	XM_001094875	0.748384	FALSE	H__sapiens__1_-705859	BTEB1	Gene KLF9	Q13886	2.25
261	6	0	18	1	5	0	6	0	1					1	ENSG00000160712	ENSP00000477739	3570	interleukin 6 receptor	"133,004,649"	GeneID:716690	"58,809"	IL6R	"132,945,840"	+	336	in gene	1	4_s4_OLD_Sirt1_Rh::1::11	-0.273811	H__sapiens__1_-711516	query	3.6	3	4_s4_OLD_Sirt1_Rh::1	18	XP_001114404	NM_181359	NP_852004	XM_001114404	0.760476	FALSE	H__sapiens__1_-711516	CD126	Gene IL6R	P08887	1.2
152	11	0	25	1	7	0	5	0	1	MmugDNA.36382.1.S1_at				19	ENSG00000125656	ENSP00000472227	8192	"ClpP caseinolytic peptidase, ATP-dependent, proteolytic subunit homolog (E. coli)"	"6,272,088"	GeneID:699593	"11,058"	CLPP	"6,261,030"	+	186	in gene	1	4_s4_OLD_Sirt1_Rh::1::154	-0.402792	H__sapiens__1_-706670	query	3.57	2.27	4_s4_OLD_Sirt1_Rh::1	25	XP_001087805	NM_006012	NP_006003	XM_001087805	0.668451	FALSE	H__sapiens__1_-706670		Gene CLPP	Q16740	1.57
253	6	0	15	1	5	0	4	0	1	MmugDNA.25433.1.S1_at				19	ENSG00000105642	ENSP00000484926	3780	"potassium intermediate/small conductance calcium-activated channel, subfamily N, member 1"	"17,573,534"	GeneID:720091	"50,377"	KCNN1	"17,523,157"	+	22907	in gene	1	4_s4_OLD_Sirt1_Rh::1::161	-0.270387	H__sapiens__1_-704130	query	3	2.5	4_s4_OLD_Sirt1_Rh::1	15	XP_001115129	NM_002248	NP_002239	XM_001115129	0.763084	FALSE	H__sapiens__1_-704130	KCa2.1	Gene KCNN1	Q92952	1.2
1631	6	0	15	1	5	0	6	0	1					11	ENSG00000151079	ENSP00000280684		"potassium voltage-gated channel, shaker-related subfamily, member 6"	"4,964,385"	GeneID:711558	"41,176"	KCNA6	"4,923,209"	+	311	in gene	1	4_s4_OLD_Sirt1_Rh::1::38	-0.0333983	H__sapiens__1_-710356	query	3	2.5	4_s4_OLD_Sirt1_Rh::1	15	XP_001101937			XM_001101937	0.967153	FALSE	H__sapiens__1_-710356	PPP1R96	Gene KCNA6		1.2
99	4	0	12	1	4	0	1	0	1	MmugDNA.30784.1.S1_at				9	ENSG00000151892	ENSP00000393725	2674	GDNF family receptor alpha 1	"115,888,150"	GeneID:706353	"195,270"	GFRA1	"115,692,880"	-	68806	in gene	1	4_s4_OLD_Sirt1_Rh::1::302	-0.282892	H__sapiens__1_-710467	query	3	3	4_s4_OLD_Sirt1_Rh::1	12	XP_001094722	NM_145793	NP_665736	XM_001094722	0.753601	FALSE	H__sapiens__1_-710467	TRNR1	Gene GFRA1	P56159	1
111	9	0	18	1	6	0	4	0	1	MmugDNA.39295.1.S1_at				15	ENSG00000106780	ENSP00000363040	1955	multiple EGF-like-domains 9	"15,406,528"	GeneID:704605	"110,553"	MEGF9	"15,295,975"	+	-551	upstream	1	4_s4_OLD_Sirt1_Rh::1::97	-0.302736	H__sapiens__1_-704339	query	3	2	4_s4_OLD_Sirt1_Rh::1	18	XP_001092970	NM_001080497	NP_001073966	XM_001092970	0.738794	FALSE	H__sapiens__1_-704339	EGFL5	Gene MEGF9	Q9H1U4	1.5
132	4	0	12	1	4	0	5	0	1	MmuSTS.1103.1.S1_at				14	ENSG00000110435	ENSP00000433204	8050	"pyruvate dehydrogenase complex, component X"	"36,907,784"	GeneID:717932	"73,156"	PDHX	"36,834,628"	-	-344	upstream	1	4_s4_OLD_Sirt1_Rh::1::81	-0.364305	H__sapiens__1_-704757	query	3	3	4_s4_OLD_Sirt1_Rh::1	12	XP_001109997	NM_003477	NP_003468	XM_001109997	0.694679	FALSE	H__sapiens__1_-704757	proX	Gene PDHX	O00330	1
402	6	0	17	1	6	0	4	0	1	MmugDNA.25646.1.S1_s_at				6	ENSG00000278461	ENSP00000484623	92259	mitochondrial ribosomal protein S36	"67,085,427"	GeneID:704287	"13,938"	MRPS36	"67,071,489"	+	18783	downstream	1	4_s4_OLD_Sirt1_Rh::1::255	-0.182639	H__sapiens__1_-707813	query	2.83	2.83	4_s4_OLD_Sirt1_Rh::1	17	XP_001092626	NM_033281	NP_150597	XM_001092626	0.833069	FALSE	H__sapiens__1_-707813	MRP-S36	Gene MRPS36	P82909	1
164	6	0	17	1	6	0	4	0	1	MmuSTS.3560.1.S1_x_at				6	ENSG00000277273	ENSP00000487392	1022	cyclin-dependent kinase 7	"67,140,939"	GeneID:699871	"50,783"	CDK7	"67,090,156"	+	116	in gene	1	4_s4_OLD_Sirt1_Rh::1::255	-0.43897	H__sapiens__1_-707815	query	2.83	2.83	4_s4_OLD_Sirt1_Rh::1	17	XP_001092242	NM_001799	NP_001790	XM_001092242	0.6447	FALSE	H__sapiens__1_-707815	MO15	Gene CDK7	P50613	1
493	6	0	17	1	6	0	6	0	1	"MmugDNA.25150.1.S1_at, MmugDNA.34749.1.S1_at, MmugDNA.34828.1.S1_at, MmugDNA.34828.1.S1_s_at, MmugDNA.42086.1.S1_at, MmugDNA.9912.1.S1_at, MmuSTS.1884.1.S1_at"				9	ENSG00000095794	ENSP00000473519	1390	cAMP responsive element modulator	"35,430,728"	GeneID:698636	"86,924"	CREM	"35,343,804"	+	436	in gene	1	4_s4_OLD_Sirt1_Rh::1::299	-0.307677	H__sapiens__1_-703020	query	2.83	2.83	4_s4_OLD_Sirt1_Rh::1	17	"XP_001091662, XP_001090136, XP_001092480, XP_001090477"	NM_183060	NP_898883	"XM_001092480, XM_001090136, XM_001090477, XM_001091662"	0.735153	FALSE	H__sapiens__1_-703020	hCREM-2	Gene CREM	Q03060	1
172	8	0	14	1	5	0	5	0	1	Mmu.13104.1.S1_at				13	ENSG00000135624	ENSP00000487267	10574	"chaperonin containing TCP1, subunit 7"	"73,556,625"	GeneID:706157	"22,102"	CCT7	"73,534,523"	+	3226	in gene	1	4_s4_OLD_Sirt1_Rh::1::67	-0.49773	H__sapiens__1_-708105	query	2.8	1.75	4_s4_OLD_Sirt1_Rh::1	14	XP_001104880	NM_006429	NP_006420	XM_001104880	0.607909	FALSE	H__sapiens__1_-708105	Nip7-1	Gene CCT7	Q99832	1.6
189	8	0	14	1	5	0	5	0	1	MmugDNA.43109.1.S1_at				13	ENSG00000135632	ENSP00000485790	10322	SMYD family member 5	"73,531,309"	GeneID:705926	"13,022"	SMYD5	"73,518,287"	+	19462	downstream	1	4_s4_OLD_Sirt1_Rh::1::67	-0.295921	H__sapiens__1_-708108	query	2.8	1.75	4_s4_OLD_Sirt1_Rh::1	14	XP_001104101	NM_006062	NP_006053	XM_001104101	0.743846	FALSE	H__sapiens__1_-708108	ZMYND23	Gene SMYD5	Q6GMV2	1.6
606	9	0	19	1	7	0	6	0	1		LCN2			15	ENSG00000148346	ENSP00000362108	3934	prostaglandin D2 synthase 21kDa (brain)	"1,280,008"	GeneID:707990	"4,052"	LCN2	"1,275,956"	-	808	in gene	1	4_s4_OLD_Sirt1_Rh::1::93	-0.311656	H__sapiens__1_-710076	query	2.71	2.11	4_s4_OLD_Sirt1_Rh::1	19	XP_001091839	NM_005564	NP_005555	XM_001091839	0.732233	FALSE	H__sapiens__1_-710076	NGAL	Gene LCN2	P80188	1.29
413	4	0	16	1	6	0	4	0	1	MmugDNA.35267.1.S1_at				15	ENSG00000096872	ENSP00000430742	80173	intraflagellar transport 74 homolog (Chlamydomonas)	"50,156,919"	GeneID:707561	"126,550"	IFT74	"50,030,369"	-	439	in gene	1	4_s4_OLD_Sirt1_Rh::1::107	-0.250443	H__sapiens__1_-703047	query	2.67	4	4_s4_OLD_Sirt1_Rh::1	16	"XP_001105415, XP_002800121, XP_002800122"	NM_025103	NP_079379	"XM_001105415, XM_002800075, XM_002800076"	0.778456	FALSE	H__sapiens__1_-703047	FLJ22621	Gene IFT74	Q96LB3	0.67
242	3	0	18	1	7	0	8	0	1	"MmugDNA.29801.1.S1_at, MmugDNA.41860.1.S1_at"				2	ENSG00000164062	ENSP00000438180	327	N-acylaminoacyl-peptide hydrolase	"86,747,474"	GeneID:705948	"9,765"	APEH	"86,737,709"	-	15794	downstream	1	4_s4_OLD_Sirt1_Rh::1::182	-0.210172	H__sapiens__1_-712220	query	2.57	6	4_s4_OLD_Sirt1_Rh::1	18	XP_001108167	NM_001640	NP_001631	XM_001108167	0.810445	FALSE	H__sapiens__1_-712220	D3S48E	Gene APEH	P13798	0.43
230	3	0	18	1	7	0	8	0	1	"MmugDNA.32988.1.S1_at, MmugDNA.34972.1.S1_at"				2	ENSG00000164068	ENSP00000487104	63891	ring finger protein 123	"86,743,791"	GeneID:705340	"46,447"	RNF123	"86,697,344"	-	12111	in gene	1	4_s4_OLD_Sirt1_Rh::1::182	-0.234477	H__sapiens__1_-712222	query	2.57	6	4_s4_OLD_Sirt1_Rh::1	18	XP_001106313	NM_022064	NP_071347	XM_001106313	0.790984	FALSE	H__sapiens__1_-712222	FLJ12565	Gene RNF123	Q5XPI4	0.43
495	6	0	15	1	6	0	3	0	1	MmugDNA.41339.1.S1_at				7	ENSG00000131979	ENSP00000477796	2643	GTP cyclohydrolase 1	"117,916,900"	GeneID:695675	"52,617"	GCH1	"117,864,283"	-	436	in gene	1	4_s4_OLD_Sirt1_Rh::1::276	-0.426233	H__sapiens__1_-707509	query	2.5	2.5	4_s4_OLD_Sirt1_Rh::1	15	"XP_001087249, XP_001087365"	NM_001024071	NP_001019242	"XM_001087365, XM_001087249"	0.652964	FALSE	H__sapiens__1_-707509	GTPCH1	Gene GCH1	P30793	1
273	5	0	15	1	6	0	4	0	1	MmugDNA.7248.1.S1_s_at				11	ENSG00000111596	ENSP00000483096	4848	"CCR4-NOT transcription complex, subunit 2"	"67,296,012"	GeneID:718501	"109,918"	CNOT2	"67,186,094"	+	242	in gene	1	4_s4_OLD_Sirt1_Rh::1::45	-0.289803	H__sapiens__1_-704888	query	2.5	3	4_s4_OLD_Sirt1_Rh::1	15	"XP_001117430, XP_001117427, XP_002798720"	NM_014515	NP_055330	"XM_002798674, XM_001117430, XM_001117427"	0.748411	FALSE	H__sapiens__1_-704888	NOT2H	Gene CNOT2	Q9NZN8	0.83
539	8	0	17	1	7	0	5	0	1	"Mmu.13021.1.S1_at, MmuSTS.3175.1.S1_at"				18	ENSG00000134758	ENSP00000463659	51444	ring finger protein 138	"25,069,372"	GeneID:706926	"39,414"	RNF138	"25,029,958"	+	954	in gene	1	4_s4_OLD_Sirt1_Rh::1::145	-0.279605	H__sapiens__1_-707938	query	2.43	2.13	4_s4_OLD_Sirt1_Rh::1	17	"XP_001100384, XP_001100574"	NM_198128	NP_937761	"XM_001100384, XM_001100574"	0.756082	FALSE	H__sapiens__1_-707938	STRIN	Gene RNF138	Q8WVD3	1.14
959	10	0	17	1	7	0	6	0	1	MmugDNA.35116.1.S1_at				1	ENSG00000117153	ENSP00000356230	59349	kelch-like 12 (Drosophila)	"167,610,053"	GeneID:705991	"39,347"	KLHL12	"167,570,706"	+	41486	downstream	1	4_s4_OLD_Sirt1_Rh::1::12	-0.186672	H__sapiens__1_-705661	query	2.43	1.7	4_s4_OLD_Sirt1_Rh::1	17	"XP_001094324, XP_002802018"	NM_021633	NP_067646	"XM_001094324, XM_002801972"	0.829716	FALSE	H__sapiens__1_-705661	C3IP1	Gene KLHL12	Q53G59	1.43
1641	5	0	12	1	5	0	1	0	1	"MmugDNA.16483.1.S1_at, MmugDNA.16483.1.S1_s_at, MmugDNA.35617.1.S1_at"				12	ENSG00000155749	ENSP00000412073	130540	"amyotrophic lateral sclerosis 2 (juvenile) chromosome region, candidate 12"	"65,112,095"	GeneID:701657	"62,466"	ALS2CR12	"65,049,629"	-	36063	in gene	1	4_s4_OLD_Sirt1_Rh::1::56	-0.0785245	H__sapiens__1_-710892	query	2.4	2.4	4_s4_OLD_Sirt1_Rh::1	12	XP_001097906	NM_139163	NP_631902	XM_001097906	0.924479	FALSE	H__sapiens__1_-710892		Gene ALS2CR12	Q96Q35	1
540	5	0	16	1	7	0	3	0	1	"Mmu.6352.1.S1_at, MmugDNA.24131.1.S1_at, MmugDNA.24132.1.S1_at, MmugDNA.24135.1.S1_at"				20	ENSG00000159579	ENSP00000457705	89970	ring finger and SPRY domain containing 1	"55,599,722"	GeneID:703783	"49,872"	RSPRY1	"55,549,850"	+	54694	downstream	1	4_s4_OLD_Sirt1_Rh::1::200	-0.078117	H__sapiens__1_-711361	query	2.29	3.2	4_s4_OLD_Sirt1_Rh::1	16	XP_001096448	NM_133368	NP_588609	XM_001096448	0.924856	FALSE	H__sapiens__1_-711361	KIAA1972	Gene RSPRY1	Q96DX4	0.71
296	5	0	16	1	7	0	3	0	1	MmugDNA.10812.1.S1_at				20	ENSG00000102931	ENSP00000457465	23568	ADP-ribosylation factor-like 2 binding protein	"55,613,673"	GeneID:703999	"9,361"	ARL2BP	"55,604,312"	+	232	in gene	1	4_s4_OLD_Sirt1_Rh::1::200	-0.342864	H__sapiens__1_-703708	query	2.29	3.2	4_s4_OLD_Sirt1_Rh::1	16	"XP_001097110, XP_002802531"	NM_012106	NP_036238	"XM_001097110, XM_002802485"	0.709735	FALSE	H__sapiens__1_-703708	BART1	Gene ARL2BP	Q9Y2Y0	0.71
1664	4	0	16	1	7	0	5	0	1	MmugDNA.40825.1.S1_at				7	ENSG00000118156	ENSP00000471665	84215	similar to transcriptional regulating factor 1	"136,851,870"	GeneID:697658	"46,937"	ZNF541	"136,804,933"	-	43246	in gene	1	4_s4_OLD_Sirt1_Rh::1::277	-0.047328	H__sapiens__1_-705763	query	2.29	4	4_s4_OLD_Sirt1_Rh::1	16	XP_001086211	NM_001277075	NP_001264004	XM_001086211	0.953774	FALSE	H__sapiens__1_-705763	DKFZp434I1930	Gene ZNF541	Q9H0D2	0.57
426	9	0	16	1	7	0	4	0	1	MmugDNA.30412.1.S1_at	GSDMDC1			8	ENSG00000278718	ENSP00000488563	79792	gasdermin D	"146,193,530"	GeneID:697137	"5,446"	GSDMD	"146,188,084"	+	12407	downstream	1	4_s4_OLD_Sirt1_Rh::1::293	-0.225169	H__sapiens__1_-703911	query	2.29	1.78	4_s4_OLD_Sirt1_Rh::1	16	XP_001085967	NM_024736	NP_079012	XM_001085967	0.798381	FALSE	H__sapiens__1_-703911	GSDMDC1	Gene GSDMD	P57764	1.29
473	5	0	16	1	7	0	3	0	1	"MmugDNA.26951.1.S1_at, MmugDNA.32862.1.S1_at, MmugDNA.32862.1.S1_s_at"				20	ENSG00000103343	ENSP00000461502	7727	zinc finger protein 174	"3,535,631"	GeneID:702964	"7,745"	ZNF174	"3,527,886"	+	146	in gene	1	4_s4_OLD_Sirt1_Rh::1::191	-0.171106	H__sapiens__1_-703783	query	2.29	3.2	4_s4_OLD_Sirt1_Rh::1	16	XP_001094522	NM_003450	NP_003441	XM_001094522	0.842732	FALSE	H__sapiens__1_-703783	ZSCAN8	Gene ZNF174	Q15697	0.71
181	6	0	22	1	10	0	6	0	1	"MmugDNA.6273.1.S1_at, MmugDNA.7206.1.S1_at, MmuSTS.4224.1.S1_at"				3	ENSG00000196313	ENSP00000486504	9883	POM121 membrane glycoprotein (rat)	"50,818,708"	GeneID:716176	"24,771"	POM121	"50,793,937"	+	335	in gene	1	4_s4_OLD_Sirt1_Rh::1::211	-0.28113	H__sapiens__1_-718082	query	2.2	3.67	4_s4_OLD_Sirt1_Rh::1	22	XP_001110260	NM_172020	NP_742017	XM_001110260	0.75493	FALSE	H__sapiens__1_-718082	POM121A	Gene POM121	Q96HA1	0.6
266	4	0	13	1	6	0	2	0	1	MmugDNA.27981.1.S1_at				7	ENSG00000137821	ENSP00000454760	54839	leucine rich repeat containing 49	"49,702,513"	GeneID:696391	"207,015"	LRRC49	"49,495,498"	+	422	in gene	1	4_s4_OLD_Sirt1_Rh::1::269	-0.22788	H__sapiens__1_-708540	query	2.17	3.25	4_s4_OLD_Sirt1_Rh::1	13	"XP_001088738, XP_001088863, XP_002804890, XP_001089082, XP_002804891"	NM_017691	NP_060161	"XM_001088738, XM_001088863, XM_002804844, XM_001089082, XM_002804845"	0.79622	FALSE	H__sapiens__1_-708540	FLJ20156	Gene LRRC49	Q8IUZ0	0.67
431	50	0	95	1	46	0	42	1	1	MmugDNA.33661.1.S1_at		negative regulation of organelle organization	GO:0010639	20	ENSG00000205629	ENSP00000461754	51451	leucine carboxyl methyltransferase 1	"23,659,835"	GeneID:702050	"72,611"	LCMT1	"23,587,224"	+	"31848, 31848"	"in gene, in gene"	2	"4_s4_OLD_Sirt1_Rh::1::195, 6_Input_overlap::1::13"	-0.268231	H__sapiens__1_-721287	query	2.07	1.9	4_s4_OLD_Sirt1_Rh::1	95	"XP_001099127, XP_001098915"	NM_016309	NP_057393	"XM_001099127, XM_001098915"	0.764731	FALSE	H__sapiens__1_-721287	PPMT1	Gene LCMT1	Q9UIC8	1.09
251	7	0	16	1	8	0	6	0	1	"MmugDNA.3587.1.S1_at, MmugDNA.7005.1.S1_at, MmugDNA.7007.1.S1_at"				11	ENSG00000136021	ENSP00000489123	55681	SCY1-like 2 (S. cerevisiae)	"101,571,324"	GeneID:695284	"71,502"	SCYL2	"101,499,822"	+	210	in gene	1	4_s4_OLD_Sirt1_Rh::1::51	-0.256951	H__sapiens__1_-708187	query	2	2.29	4_s4_OLD_Sirt1_Rh::1	16	XP_001089370	NM_017988	NP_060458	XM_001089370	0.773406	FALSE	H__sapiens__1_-708187	KIAA1360	Gene SCYL2	Q6P3W7	0.88
330	6	0	16	1	8	0	3	0	1	MmugDNA.25593.1.S1_at		negative regulation of organelle organization	GO:0010639	15	ENSG00000165060	ENSP00000419243	2395	frataxin	"77,874,474"	GeneID:699469	"39,562"	FXN	"77,834,912"	+	64	in gene	1	4_s4_OLD_Sirt1_Rh::1::110	-0.275396	H__sapiens__1_-712507	query	2	2.67	4_s4_OLD_Sirt1_Rh::1	16	XP_001093449	NM_181425	NP_852090	XM_001093449	0.759272	FALSE	H__sapiens__1_-712507	X25	Gene FXN	Q16595	0.75
373	8	0	14	1	7	0	4	0	1					8	ENSG00000104472	ENSP00000430484	54108	chromatin accessibility complex 1	"143,004,506"	GeneID:700384	"5,318"	CHRAC1	"142,999,188"	+	124	in gene	1	4_s4_OLD_Sirt1_Rh::1::292	-0.205122	H__sapiens__1_-703906	query	2	1.75	4_s4_OLD_Sirt1_Rh::1	14	XP_001090712	NM_017444	NP_059140	XM_001090712	0.814548	FALSE	H__sapiens__1_-703906	YCL1	Gene CHRAC1	Q9NRG0	1.14
127	7	0	18	1	9	0	6	0	1	"Mmu.10506.1.S1_at, Mmu.10506.1.S1_s_at, MmugDNA.1057.1.S1_at"				15	ENSG00000086061	ENSP00000369127	3301	"DnaJ (Hsp40) homolog, subfamily A, member 1"	"44,195,858"	GeneID:703765	"14,704"	DNAJA1	"44,181,154"	-	114	in gene	1	4_s4_OLD_Sirt1_Rh::1::105	-0.354416	H__sapiens__1_-702658	query	2	2.57	4_s4_OLD_Sirt1_Rh::1	18	XP_001101766	NM_001539	NP_001530	XM_001101766	0.701583	FALSE	H__sapiens__1_-702658	NEDD7	Gene DNAJA1	P31689	0.78
141	11	0	18	1	9	0	11	0	1	MmuSTS.2717.1.S1_at				14	ENSG00000281702	ENSP00000487456	3145	hydroxymethylbilane synthase	"117,499,749"	GeneID:702943	"8,404"	HMBS	"117,491,345"	+	9967	downstream	1	4_s4_OLD_Sirt1_Rh::1::89	-0.382126	H__sapiens__1_-746347	query	2	1.64	4_s4_OLD_Sirt1_Rh::1	18	"XP_001101850, XP_001101764, XP_001101575, XP_001101668"	NM_001258209	NP_001245138	"XM_001101764, XM_001101850, XM_001101575, XM_001101668"	0.682409	FALSE	H__sapiens__1_-746347	UPS	Gene HMBS	P08397	1.22
142	11	0	18	1	9	0	11	0	1	MmuSTS.2587.1.S1_at				14	ENSG00000172269	ENSP00000490380	1798	dolichyl-phosphate (UDP-N-acetylglucosamine) N-acetylglucosaminephosphotransferase 1 (GlcNAc-1-P transferase)	"117,508,126"	GeneID:703538	"5,423"	DPAGT1	"117,502,703"	-	6814	downstream	1	4_s4_OLD_Sirt1_Rh::1::89	-0.359384	H__sapiens__1_-714264	query	2	1.64	4_s4_OLD_Sirt1_Rh::1	18	XP_001102857	NM_001382	NP_001373	XM_001102857	0.698106	FALSE	H__sapiens__1_-714264	DPAGT2	Gene DPAGT1	Q9H3H5	1.22
162	5	0	12	1	6	0	2	0	1	MmuSTS.3622.1.S1_at				13	ENSG00000162928	ENSP00000405413	5194	peroxisomal biogenesis factor 13	"61,224,831"	GeneID:717886	"34,315"	PEX13	"61,190,516"	+	-260	upstream	1	4_s4_OLD_Sirt1_Rh::1::66	-0.265984	H__sapiens__1_-711864	query	2	2.4	4_s4_OLD_Sirt1_Rh::1	12	XP_001115402	NM_002618	NP_002609	XM_001115402	0.766451	FALSE	H__sapiens__1_-711864		Gene PEX13	Q92968	0.83
205	5	0	16	1	8	0	6	0	1	"MmugDNA.12788.1.S1_at, MmugDNA.32249.1.S1_at"				16	ENSG00000166685	ENSP00000479450	9382	component of oligomeric golgi complex 1	"68,465,397"	GeneID:695754	"15,219"	COG1	"68,450,178"	+	222	in gene	1	4_s4_OLD_Sirt1_Rh::1::132	-0.133168	H__sapiens__1_-712909	query	2	3.2	4_s4_OLD_Sirt1_Rh::1	16	"XP_001086027, XP_001085918, XP_002800627"	NM_018714	NP_061184	"XM_001086027, XM_002800581, XM_001085918"	0.875318	FALSE	H__sapiens__1_-712909	LDLB	Gene COG1	Q8WTW3	0.63
233	8	0	16	1	8	0	5	0	1	"MmugDNA.2270.1.S1_at, MmugDNA.6761.1.S1_at, MmugDNA.6761.1.S1_x_at, MmugDNA.6763.1.S1_at"	KIAA1967			9	ENSG00000060339	ENSP00000486408	55749	cell division cycle and apoptosis regulator 1	"68,519,957"	GeneID:693585	"77,996"	CCAR1	"68,441,961"	-	181	in gene	1	4_s4_OLD_Sirt1_Rh::1::301	-0.211644	H__sapiens__1_-701788	query	2	2	4_s4_OLD_Sirt1_Rh::1	16	XP_001083295	NM_018237	NP_060707	XM_001083295	0.809253	FALSE	H__sapiens__1_-701788	FLJ10590	Gene CCAR1	Q8IX12	1
680	7	0	20	1	11	0	5	0	1	"MmugDNA.14229.1.S1_at, MmugDNA.28989.1.S1_at, MmugDNA.39885.1.S1_at, MmuSTS.62.1.S1_at"				4	ENSG00000118689	ENSP00000446316	2309	forkhead box O3	"155,337,962"	GeneID:700731	"125,922"	FOXO3	"155,212,040"	-	170	in gene	1	4_s4_OLD_Sirt1_Rh::1::239	-0.306915	H__sapiens__1_-705821	query	1.82	2.86	4_s4_OLD_Sirt1_Rh::1	20	XP_001093593	NM_201559	NP_963853	XM_001093593	0.735713	FALSE	H__sapiens__1_-705821	FOXO3A	Gene FOXO3	O43524	0.64
417	6	0	17	1	9.5	0	3.5	0	2	MmuSTS.1485.1.S1_at				13	ENSG00000188177	ENSP00000386764	376940	zinc finger CCCH-type containing 6	"111,747,178"	GeneID:698951	"57,644"	ZC3H6	"111,689,534"	+	"-222, 226"	"upstream, in gene"	2	"4_s4_OLD_Sirt1_Rh::1::68, 4_s4_OLD_Sirt1_Rh::1::69"	-0.0923521	H__sapiens__1_-717667	query	1.79	2.83	4_s4_OLD_Sirt1_Rh::1	19	XP_001087547	NM_198581	NP_940983	XM_001087547	0.911784	FALSE	H__sapiens__1_-717667	ZC3HDC6	Gene ZC3H6	P61129	0.63
265	6	0	16	1	9	0	5	0	1	"MmugDNA.26276.1.S1_at, MmuSTS.1917.1.S1_at"				12	ENSG00000116106	ENSP00000444085	2043	EPH receptor A4	"85,444,175"	GeneID:704857	"149,004"	EPHA4	"85,295,171"	-	703	in gene	1	4_s4_OLD_Sirt1_Rh::1::57	-0.277308	H__sapiens__1_-705512	query	1.78	2.67	4_s4_OLD_Sirt1_Rh::1	16	XP_001106493	NM_004438	NP_004429	XM_001106493	0.757821	FALSE	H__sapiens__1_-705512	TYRO1	Gene EPHA4	P54764	0.67
833	5	0	16	1	9	0	3	0	1	MmugDNA.36782.1.S1_at				2	ENSG00000154743	ENSP00000416510	80746	tRNA splicing endonuclease 2 homolog (S. cerevisiae)	"48,576,622"	GeneID:695083	"48,701"	TSEN2	"48,527,921"	-	78	in gene	1	4_s4_OLD_Sirt1_Rh::1::180	-0.185568	H__sapiens__1_-710798	query	1.78	3.2	4_s4_OLD_Sirt1_Rh::1	16	XP_001086382	NM_025265	NP_079541	XM_001086382	0.830633	FALSE	H__sapiens__1_-710798	SEN2L	Gene TSEN2	Q8NCE0	0.56
88	11	1	5	0	3	0	1	0	1	MmugDNA.13422.1.S1_at				13	ENSG00000019169	ENSP00000409192	8685	macrophage receptor with collagenous structure	"125,165,225"	GeneID:694432	"58,775"	MARCO	"125,106,450"	+	11950	in gene	1	2_s2_SIV_Sirt1_Rh::1::12	-0.263663	H__sapiens__1_-701363	query	1.67	0.45	2_s2_SIV_Sirt1_Rh::1	11	XP_001083118	NM_006770	NP_006761	XM_001083118	0.768233	FALSE	H__sapiens__1_-701363	SCARA2	Gene MARCO	Q9UEW3	3.67
130	8	0	20	1	12	0	11	0	1					20	ENSG00000063854	ENSP00000457986	3029	hydroxyacylglutathione hydrolase	"1,812,937"	GeneID:703206	"16,795"	HAGH	"1,796,142"	-	-119	upstream	1	4_s4_OLD_Sirt1_Rh::1::189	-0.36216	H__sapiens__1_-701842	query	1.67	2.5	4_s4_OLD_Sirt1_Rh::1	20	"XP_001090907, XP_001090793"	NM_005326	NP_005317	"XM_001090907, XM_001090793"	0.696171	FALSE	H__sapiens__1_-701842	HAGH1	Gene HAGH	Q16775	0.67
150	3	0	15	1	9	0	3	0	1	"MmugDNA.27942.1.S1_at, MmugDNA.27942.1.S1_s_at, MmugDNA.2865.1.S1_at, MmuSTS.3483.1.S1_at"				4	ENSG00000236227	ENSP00000475691	6046	bromodomain containing 2	"32,689,476"	GeneID:717893	"12,945"	BRD2	"32,676,531"	+	-131	upstream	1	4_s4_OLD_Sirt1_Rh::1::232	-0.294821	H__sapiens__1_-720838	query	1.67	5	4_s4_OLD_Sirt1_Rh::1	15	"XP_001115845, XP_001115854, XP_001115810"	NM_005104	NP_005095	"XM_001115854, XM_001115845, XM_001115810"	0.744665	FALSE	H__sapiens__1_-720838	RING3	Gene BRD2	P25440	0.33
1188	5	0	15	1	9	0	5	0	1	MmugDNA.34854.1.S1_at				5	ENSG00000184178	ENSP00000478569	152579	sec1 family domain containing 2	"76,521,308"	GeneID:698111	"502,936"	SCFD2	"76,018,372"	+	-9188	upstream	1	4_s4_OLD_Sirt1_Rh::1::245	-0.142751	H__sapiens__1_-716683	query	1.67	3	4_s4_OLD_Sirt1_Rh::1	15	"XP_001091758, XP_001091415"	NM_152540	NP_689753	"XM_001091758, XM_001091415"	0.86697	FALSE	H__sapiens__1_-716683	STXBP1L1	Gene SCFD2	Q8WU76	0.56
186	6	0	15	1	9	0	4	0	1	MmugDNA.11204.1.S1_at				2	ENSG00000144712	ENSP00000486760	23066	cullin-associated and neddylation-dissociated 2 (putative)	"48,249,622"	GeneID:694326	"38,386"	CAND2	"48,211,236"	-	13558	in gene	1	4_s4_OLD_Sirt1_Rh::1::179	-0.174585	H__sapiens__1_-709600	query	1.67	2.5	4_s4_OLD_Sirt1_Rh::1	15	"XP_001084764, XP_001084646"	NM_012298	NP_036430	"XM_001084764, XM_001084646"	0.839806	FALSE	H__sapiens__1_-709600	Tp120b	Gene CAND2	O75155	0.67
215	5	0	15	1	9	0	5	0	1	MmugDNA.29607.1.S1_at				5	ENSG00000145216	ENSP00000425456	81608	FIP1 like 1 (S. cerevisiae)	"76,009,610"	GeneID:697725	"74,247"	FIP1L1	"75,935,363"	-	426	in gene	1	4_s4_OLD_Sirt1_Rh::1::245	-0.202594	H__sapiens__1_-709662	query	1.67	3	4_s4_OLD_Sirt1_Rh::1	15	"XP_001090115, XP_001090808, XP_001090572, XP_001089763, XP_002804161, XP_001089880"	NM_030917	NP_112179	"XM_001090808, XM_001090115, XM_001089763, XM_002804115, XM_001089880, XM_001090572"	0.81661	FALSE	H__sapiens__1_-709662	FIP1	Gene FIP1L1	Q6UN15	0.56
249	5	0	16	1	10	0	7	0	1	MmugDNA.18362.1.S1_at	CAT53	nucleocytoplasmic transport|nuclear transport	GO:0006913|GO:0051169	4	ENSG00000238104	ENSP00000416060	5514	"protein phosphatase 1, regulatory (inhibitor) subunit 10"	"30,188,729"	GeneID:711949	"9,128"	PPP1R10	"30,179,601"	-	-7847	upstream	1	4_s4_OLD_Sirt1_Rh::1::230	-0.264434	H__sapiens__1_-720970	query	1.6	3.2	4_s4_OLD_Sirt1_Rh::1	16	NP_001108416	NM_002714	NP_002705	NM_001114944	0.76764	FALSE	H__sapiens__1_-720970	PNUTS	Gene PPP1R10	Q96QC0	0.5
123	5	0	16	1	10	0	7	0	1	"MmugDNA.14461.1.S1_at, MmugDNA.33425.1.S1_at"				4	ENSG00000233813	ENSP00000415703	28973	mitochondrial ribosomal protein S18B	"30,204,328"	GeneID:713694	"7,718"	MRPS18B	"30,196,610"	+	-34	upstream	1	4_s4_OLD_Sirt1_Rh::1::230	-0.299577	H__sapiens__1_-720644	query	1.6	3.2	4_s4_OLD_Sirt1_Rh::1	16	NP_001098635	NM_014046	NP_054765	NM_001105165	0.741131	FALSE	H__sapiens__1_-720644	PTD017	Gene MRPS18B	Q9Y676	0.5
220	5	0	16	1	10	0	4	0	1					16	ENSG00000167840	ENSP00000461305	7775	zinc finger protein 232	"4,893,705"	GeneID:721621	"2,915"	ZNF232	"4,890,790"	-	89	in gene	1	4_s4_OLD_Sirt1_Rh::1::115	-0.216848	H__sapiens__1_-713209	query	1.6	3.2	4_s4_OLD_Sirt1_Rh::1	16	XP_001117806	NM_014519	NP_055334	XM_001117806	0.805053	FALSE	H__sapiens__1_-713209	ZSCAN11	Gene ZNF232	Q9UNY5	0.5
342	7	0	14	1	9	0	3	0	1	"MmugDNA.35136.1.S1_at, MmuSTS.2778.1.S1_at"		negative regulation of organelle organization|nucleocytoplasmic transport|nuclear transport	GO:0010639|GO:0006913|GO:0051169	7	ENSG00000142208	ENSP00000481526	207	v-akt murine thymoma viral oncogene homolog 1	"168,173,573"	GeneID:697747	"24,808"	AKT1	"168,148,765"	-	-6758	upstream	1	4_s4_OLD_Sirt1_Rh::1::281	-0.523165	H__sapiens__1_-709207	query	1.56	2	4_s4_OLD_Sirt1_Rh::1	14	"XP_001085623, XP_001085265, XP_001085495"	NM_005163	NP_005154	"XM_001085265, XM_001085623, XM_001085495"	0.592642	FALSE	H__sapiens__1_-709207	RAC	Gene AKT1	P31749	0.78
259	8	0	16	1	11	0	8	0	1					6	ENSG00000171368	ENSP00000353785	11076	tubulin polymerization promoting protein	"450,774"	GeneID:708834	"30,432"	TPPP	"420,342"	-	502	in gene	1	4_s4_OLD_Sirt1_Rh::1::250	-0.245377	H__sapiens__1_-714041	query	1.45	2	4_s4_OLD_Sirt1_Rh::1	16	XP_001095130	NM_007030	NP_008961	XM_001095130	0.782409	FALSE	H__sapiens__1_-714041	TPPP1	Gene TPPP	O94811	0.73
175	6	0	15	1	11	0	4	0	1	MmuSTS.4415.1.S1_at		nuclear export|nucleic acid transport|establishment of RNA localization|RNA export from nucleus|nucleocytoplasmic transport|RNA transport|RNA localization|nuclear transport	GO:0051168|GO:0050657|GO:0051236|GO:0006405|GO:0006913|GO:0050658|GO:0006403|GO:0051169	18	ENSG00000079134	ENSP00000486359	9984	THO complex 1	"13,857,676"	GeneID:697954	"52,074"	THOC1	"13,805,602"	+	-34	upstream	1	4_s4_OLD_Sirt1_Rh::1::142	-0.396197	H__sapiens__1_-702425	query	1.36	2.5	4_s4_OLD_Sirt1_Rh::1	15	XP_001090085	NM_005131	NP_005122	XM_001090085	0.672874	FALSE	H__sapiens__1_-702425	HPR1	Gene THOC1	Q96FV9	0.55
409	8	0	17	1	13	0	5	0	1	"MmugDNA.41505.1.S1_at, MmuSTS.3933.1.S1_at"				6	ENSG00000158987	ENSP00000487439	51735	Rap guanine nucleotide exchange factor (GEF) 6	"128,223,709"	GeneID:706541	"382,889"	RAPGEF6	"127,840,820"	-	-3	upstream	1	4_s4_OLD_Sirt1_Rh::1::257	-0.215711	H__sapiens__1_-711284	query	1.31	2.13	4_s4_OLD_Sirt1_Rh::1	17	"XP_001101336, XP_001101427, XP_001100970, XP_001100863, XP_001101236, XP_002804552"	NM_016340	NP_057424	"XM_001101336, XM_001101427, XM_001101236, XM_002804506, XM_001100970, XM_001100863"	0.805968	FALSE	H__sapiens__1_-711284	RA-GEF-2	Gene RAPGEF6	Q8TEU7	0.62
254	10	0	16	1	13	0	3	0	1					20	ENSG00000127561	ENSP00000481324	9143	similar to Synaptogyrin-3	"1,978,432"	GeneID:694003	"4,348"	SYNGR3	"1,974,084"	+	-7311	upstream	1	4_s4_OLD_Sirt1_Rh::1::190	-0.264359	H__sapiens__1_-706919	query	1.23	1.6	4_s4_OLD_Sirt1_Rh::1	16	XP_001082714	NM_004209	NP_004200	XM_001082714	0.767698	FALSE	H__sapiens__1_-706919		Gene SYNGR3	O43761	0.77
1375	10	0	16	1	13	0	3	0	1	MmugDNA.26281.1.S1_at				20	ENSG00000196408	ENSP00000456800	124056	NADPH oxidase organizer 1	"1,964,139"	GeneID:694059	"2,122"	NOXO1	"1,962,017"	-	-2634	upstream	1	4_s4_OLD_Sirt1_Rh::1::190	-0.130296	H__sapiens__1_-718120	query	1.23	1.6	4_s4_OLD_Sirt1_Rh::1	16	XP_001082129	NM_172168	NP_751908	XM_001082129	0.877836	FALSE	H__sapiens__1_-718120	SNX28	Gene NOXO1	Q8NFA2	0.77
139	10	0	16	1	13	0	3	0	1	MmugDNA.18998.1.S1_at				20	ENSG00000183751	ENSP00000481995	10607	transducin (beta)-like 3	"1,961,717"	GeneID:693864	"6,911"	TBL3	"1,954,806"	+	11967	downstream	1	4_s4_OLD_Sirt1_Rh::1::190	-0.372471	H__sapiens__1_-716584	query	1.23	1.6	4_s4_OLD_Sirt1_Rh::1	16	XP_001082569	NM_006453	NP_006444	XM_001082569	0.689029	FALSE	H__sapiens__1_-716584	UTP13	Gene TBL3	Q12788	0.77
438	10	0	16	1	13	0	3	0	1	MmugDNA.28604.1.S1_at				20	ENSG00000127554	ENSP00000456432	2671	"growth factor, augmenter of liver regeneration"	"1,969,063"	GeneID:694203	"1,849"	GFER	"1,967,214"	+	-441	upstream	1	4_s4_OLD_Sirt1_Rh::1::190	-0.229078	H__sapiens__1_-706918	query	1.23	1.6	4_s4_OLD_Sirt1_Rh::1	16	XP_001082639	NM_005262	NP_005253	XM_001082639	0.795266	FALSE	H__sapiens__1_-706918	HPO2	Gene GFER	P55789	0.77
299	5	0	14	1	12	0	3	0	1	"MmugDNA.17069.1.S1_at, MmuSTS.1491.1.S1_at"				1	ENSG00000162702	ENSP00000356322	23528	zinc finger protein 281	"170,095,792"	GeneID:709466	"5,113"	ZNF281	"170,090,679"	+	105	in gene	1	4_s4_OLD_Sirt1_Rh::1::14	-0.247151	H__sapiens__1_-711800	query	1.17	2.8	4_s4_OLD_Sirt1_Rh::1	14	XP_001110006	NM_012482	NP_036614	XM_001110006	0.781023	FALSE	H__sapiens__1_-711800	ZBP-99	Gene ZNF281	Q9Y2X9	0.42
107	13	0	36	1	33	1	9	0	1	"MmugDNA.41285.1.S1_at, MmugDNA.41285.1.S1_s_at"				12	ENSG00000132326	ENSP00000405891	8864	period homolog 2 (Drosophila)	"102,159,115"	GeneID:696476	"44,048"	PER2	"102,115,067"	-	"1163, 1227"	"in gene, in gene"	2	"4_s4_OLD_Sirt1_Rh::1::59, 5_s5_208_Sirt1_Rh::1::23"	-0.244706	H__sapiens__1_-707551	query	1.09	2.77	4_s4_OLD_Sirt1_Rh::1	36	XP_001086845	NM_022817	NP_073728	XM_001086845	0.782935	FALSE	H__sapiens__1_-707551	KIAA0347	Gene PER2	O15055	0.39
692	7.5	0	19.5	1	18	1	2.5	0	2	"MmugDNA.34943.1.S1_at, MmuSTS.2233.1.S1_at"				10	ENSG00000167074	ENSP00000411170	7008	thyrotrophic embryonic factor	"85,356,236"	GeneID:707009	"30,051"	TEF	"85,326,185"	+	"12343, 13191, 12263, 12631"	"in gene, in gene, in gene, in gene"	4	"4_s4_OLD_Sirt1_Rh::1::34, 4_s4_OLD_Sirt1_Rh::1::35, 5_s5_208_Sirt1_Rh::1::14, 5_s5_208_Sirt1_Rh::1::15"	-0.190023	H__sapiens__1_-713008	query	1.08	2.6	4_s4_OLD_Sirt1_Rh::1	24	"XP_001104091, XP_001104007, XP_002798412"	NM_003216	NP_003207	"XM_001104007, XM_002798366, XM_001104091"	0.82694	FALSE	H__sapiens__1_-713008	KIAA1655	Gene TEF	Q10587	0.42
297	6	0	15	1	14	0	4	0	1	"MmugDNA.16101.1.S1_at, MmugDNA.27397.1.S1_at"				14	ENSG00000172638	ENSP00000437238	30008	EGF-containing fibulin-like extracellular matrix protein 2	"8,588,149"	GeneID:721877	"6,197"	EFEMP2	"8,581,952"	+	14640	downstream	1	4_s4_OLD_Sirt1_Rh::1::76	-0.302569	H__sapiens__1_-714351	query	1.07	2.5	4_s4_OLD_Sirt1_Rh::1	15	XP_001118071	NM_016938	NP_058634	XM_001118071	0.738917	FALSE	H__sapiens__1_-714351	UPH1	Gene EFEMP2	O95967	0.43
286	185.5	1	189.5	1	180.5	1	148.5	1	2	"MmugDNA.2057.1.S1_at, MmugDNA.6417.1.S1_at, MmugDNA.6419.1.S1_at, MmuSTS.1093.1.S1_at"				17	ENSG00000139514	ENSP00000390092	6541	"solute carrier family 7 (cationic amino acid transporter, y+ system), member 1"	"9,132,935"	GeneID:712410	"79,643"	SLC7A1	"9,053,292"	-	"-3353, -10681, -10425, -10713, -3385, -10777"	"upstream, upstream, upstream, upstream, upstream, upstream"	6	"2_s2_SIV_Sirt1_Rh::1::19, 2_s2_SIV_Sirt1_Rh::1::20, 4_s4_OLD_Sirt1_Rh::1::135, 5_s5_208_Sirt1_Rh::1::53, 6_Input_overlap::1::8, 6_Input_overlap::1::9"	-0.197914	H__sapiens__1_-708827	query	1.05	1.02	2_s2_SIV_Sirt1_Rh::1	200	"XP_001098500, XP_002800751"	NM_003045	NP_003036	"XM_001098500, XM_002800705"	0.82044	FALSE	H__sapiens__1_-708827	REC1L	Gene SLC7A1	P30825	1.03
137	20	1	57	1	55	1	6	0	1			negative regulation of organelle organization	GO:0010639	16	ENSG00000004897	ENSP00000466424	996	cell division cycle 27 homolog (S. cerevisiae)	"57,265,237"	GeneID:717321	"66,970"	CDC27	"57,198,267"	-	"293, -43, -75"	"in gene, upstream, upstream"	3	"2_s2_SIV_Sirt1_Rh::1::18, 4_s4_OLD_Sirt1_Rh::1::131, 5_s5_208_Sirt1_Rh::1::51"	-0.372054	H__sapiens__1_-701042	query	1.04	2.85	4_s4_OLD_Sirt1_Rh::1	57	XP_001115976	NM_001293091	NP_001280020	XM_001115976	0.689317	FALSE	H__sapiens__1_-701042	NUC2	Gene CDC27	P30260	0.36
147	10	0	40	1	40	1	8	0	1	MmugDNA.9471.1.S1_at		nuclear speck	GO:0016607	7	ENSG00000100813	ENSP00000483298	22985	apoptotic chromatin condensation inducer 1	"85,925,757"	GeneID:713310	"37,633"	ACIN1	"85,888,124"	-	"365, 285"	"in gene, in gene"	2	"4_s4_OLD_Sirt1_Rh::1::273, 5_s5_208_Sirt1_Rh::1::96"	-0.387758	H__sapiens__1_-703367	query	1	4	4_s4_OLD_Sirt1_Rh::1	40	"XP_001106207, XP_002805029, XP_001105785"	NM_014977	NP_055792	"XM_001106207, XM_002804983, XM_001105785"	0.678577	FALSE	H__sapiens__1_-703367	KIAA0670	Gene ACIN1	Q9UKV3	0.25
550	8	0	24.5	1	25.5	1	4	0	2	MmugDNA.29861.1.S1_at				19	ENSG00000063180	ENSP00000469234	770	carbonic anhydrase XI	"54,951,702"	GeneID:718066	"8,626"	CA11	"54,943,076"	-	"8966, 9654, 8982"	"downstream, downstream, downstream"	3	"4_s4_OLD_Sirt1_Rh::1::169, 5_s5_208_Sirt1_Rh::1::63, 5_s5_208_Sirt1_Rh::1::64"	-0.318785	H__sapiens__1_-701831	query	0.96	3.06	4_s4_OLD_Sirt1_Rh::1	43	XP_001113730	NM_001217	NP_001208	XM_001113730	0.727032	FALSE	H__sapiens__1_-701831	CARPX1	Gene CA11	O75493	0.31
468	6	0	13	0	14	1	3	0	1	MmugDNA.26905.1.S1_at				12	ENSG00000013441	ENSP00000479484	1195	CDC-like kinase 1	"64,617,576"	GeneID:700320	"11,581"	CLK1	"64,605,995"	-	296	in gene	1	5_s5_208_Sirt1_Rh::1::22	-0.366034	H__sapiens__1_-701309	query	0.93	2.17	5_s5_208_Sirt1_Rh::1	14	XP_001093219	NM_004071	NP_004062	XM_001093219	0.693479	FALSE	H__sapiens__1_-701309		Gene CLK1	P49759	0.43
221	6	0	13	0	14	1	3	0	1	MmugDNA.13201.1.S1_at				12	ENSG00000240344	ENSP00000401196	53938	peptidylprolyl isomerase (cyclophilin)-like 3	"64,641,008"	GeneID:700456	"17,679"	PPIL3	"64,623,329"	-	23728	downstream	1	5_s5_208_Sirt1_Rh::1::22	-0.0933519	H__sapiens__1_-738375	query	0.93	2.17	5_s5_208_Sirt1_Rh::1	14	XP_001093554	NM_130906	NP_570981	XM_001093554	0.910873	FALSE	H__sapiens__1_-738375	CyPJ	Gene PPIL3	Q9H2H8	0.43
285	10	0	15	0	18	1	7	0	1	MmugDNA.33673.1.S1_at				14	ENSG00000135372	ENSP00000479141	55226	N-acetyltransferase 10	"37,716,165"	GeneID:717452	"42,493"	NAT10	"37,673,672"	-	69	in gene	1	5_s5_208_Sirt1_Rh::1::33	-0.318573	H__sapiens__1_-708048	query	0.83	1.5	5_s5_208_Sirt1_Rh::1	18	"XP_001115721, XP_002799630"	NM_024662	NP_078938	"XM_001115721, XM_002799584"	0.727186	FALSE	H__sapiens__1_-708048	NET43	Gene NAT10	Q9H0A0	0.56
324	10	0	13	1	17	1	3	0	1	MmuSTS.471.1.S1_at				10	ENSG00000100280	ENSP00000400065	162	"adaptor-related protein complex 1, beta 1 subunit"	"73,217,113"	GeneID:714638	"62,448"	AP1B1	"73,154,665"	-	"-1927, -1895"	"upstream, upstream"	2	"4_s4_OLD_Sirt1_Rh::1::31, 5_s5_208_Sirt1_Rh::1::12"	-0.449872	H__sapiens__1_-703221	query	0.76	1.3	5_s5_208_Sirt1_Rh::1	17	"XP_001106103, XP_001106034, XP_001105756"	NM_145730	NP_663782	"XM_001106034, XM_001106103, XM_001105756"	0.63771	FALSE	H__sapiens__1_-703221	CLAPB2	Gene AP1B1	Q10567	0.59
311	5	0	12	0	16	1	2	0	1	MmugDNA.4374.1.S1_at		nucleocytoplasmic transport|nuclear transport	GO:0006913|GO:0051169	15	ENSG00000107175	ENSP00000342136	10488	cAMP responsive element binding protein 3	"41,789,245"	GeneID:696350	"5,125"	CREB3	"41,784,120"	-	157	in gene	1	5_s5_208_Sirt1_Rh::1::40	-0.358647	H__sapiens__1_-704374	query	0.75	2.4	5_s5_208_Sirt1_Rh::1	16	"XP_001085696, XP_002800126"	NM_006368	NP_006359	"XM_001085696, XM_002800080"	0.698621	FALSE	H__sapiens__1_-704374	sLZIP	Gene CREB3	O43889	0.31
213	5	0	12	0	16	1	2	0	1	"MmugDNA.30985.1.S1_at, MmugDNA.5251.1.S1_at"				15	ENSG00000070610	ENSP00000367343	57704	"glucosidase, beta (bile acid) 2"	"41,784,750"	GeneID:696062	"12,437"	GBA2	"41,772,313"	+	16775	downstream	1	5_s5_208_Sirt1_Rh::1::40	-0.155203	H__sapiens__1_-702096	query	0.75	2.4	5_s5_208_Sirt1_Rh::1	16	XP_001084705	NM_020944	NP_065995	XM_001084705	0.856241	FALSE	H__sapiens__1_-702096	SPG46	Gene GBA2	Q9HCG7	0.31
483	5	0	12	0	16	1	2	0	1	"MmugDNA.40124.1.S1_at, MmugDNA.40124.1.S1_s_at"				15	ENSG00000137076	ENSP00000316029	7094	talin 1	"41,824,051"	GeneID:696298	"34,873"	TLN1	"41,789,178"	+	-90	upstream	1	5_s5_208_Sirt1_Rh::1::40	-0.386307	H__sapiens__1_-708390	query	0.75	2.4	5_s5_208_Sirt1_Rh::1	16	XP_001084941	NM_006289	NP_006280	XM_001084941	0.679562	FALSE	H__sapiens__1_-708390		Gene TLN1	Q9Y490	0.31
488	1	0	10	0	14	1	3	0	1			nuclear export|nucleic acid transport|establishment of RNA localization|RNA export from nucleus|nucleocytoplasmic transport|RNA transport|RNA localization|nuclear transport	GO:0051168|GO:0050657|GO:0051236|GO:0006405|GO:0006913|GO:0050658|GO:0006403|GO:0051169	15	ENSG00000165699	ENSP00000444017	7248	tuberous sclerosis 1	"5,743,522"	GeneID:714645	"53,859"	TSC1	"5,689,663"	+	-111	upstream	1	5_s5_208_Sirt1_Rh::1::38	-0.40297	H__sapiens__1_-712663	query	0.71	10	5_s5_208_Sirt1_Rh::1	14	XP_001103846	NM_001162427	NP_001155899	XM_001103846	0.668332	FALSE	H__sapiens__1_-712663	KIAA0243	Gene TSC1	Q92574	0.07
810	3	0	8	0	13	1	5	0	1	MmuSTS.1936.1.S1_at				14	ENSG00000110429	ENSP00000435680	26273	F-box protein 3	"38,093,175"	GeneID:693281	"34,217"	FBXO3	"38,058,958"	+	38978	downstream	1	5_s5_208_Sirt1_Rh::1::34	-0.234317	H__sapiens__1_-704756	query	0.62	2.67	5_s5_208_Sirt1_Rh::1	13	XP_001082360	NM_033406	NP_208385	XM_001082360	0.791111	FALSE	H__sapiens__1_-704756	FBX3	Gene FBXO3	Q9UK99	0.23
116	3	0	8	0	13	1	5	0	1	"MmugDNA.151.1.S1_at, MmugDNA.152.1.S1_at, MmuSTS.1851.1.S1_at"				14	ENSG00000085063	ENSP00000437122	966	"CD59 molecule, complement regulatory protein"	"38,120,786"	GeneID:693402	"23,135"	CD59	"38,097,651"	+	285	in gene	1	5_s5_208_Sirt1_Rh::1::34	-0.3137	H__sapiens__1_-702620	query	0.62	2.67	5_s5_208_Sirt1_Rh::1	13	"XP_001082751, XP_001083003"	NM_203331	NP_976076	"XM_001082751, XM_001083003"	0.730739	FALSE	H__sapiens__1_-702620	p18-20	Gene CD59	P13987	0.23
120	5	0	6	0	11	1	2	0	1	MmuSTS.1294.1.S1_at				1	ENSG00000076864	ENSP00000441661	5909	RAP1 GTPase activating protein	"24,257,579"	GeneID:717830	"65,594"	RAP1GAP	"24,191,985"	-	20427	in gene	1	5_s5_208_Sirt1_Rh::1::1	-0.211611	H__sapiens__1_-702334	query	0.55	1.2	5_s5_208_Sirt1_Rh::1	11	XP_001109771	NM_002885	NP_002876	XM_001109771	0.80928	FALSE	H__sapiens__1_-702334	RAP1GAPII	Gene RAP1GAP	P47736	0.45
565	6	0	3	0	10	1	2	0	1	"MmugDNA.19831.1.S1_at, MmugDNA.38746.1.S1_at"		nuclear export|nucleic acid transport|establishment of RNA localization|RNA export from nucleus|nucleocytoplasmic transport|RNA transport|RNA localization|nuclear transport	GO:0051168|GO:0050657|GO:0051236|GO:0006405|GO:0006913|GO:0050658|GO:0006403|GO:0051169	7	ENSG00000165934	ENSP00000452503	53981	"cleavage and polyadenylation specific factor 2, 100kDa"	"155,365,692"	GeneID:697875	"30,872"	CPSF2	"155,334,820"	+	28540	in gene	1	5_s5_208_Sirt1_Rh::1::98	-0.201539	H__sapiens__1_-712716	query	0.3	0.5	5_s5_208_Sirt1_Rh::1	10	"XP_001092942, XP_002805234"	NM_017437	NP_059133	"XM_001092942, XM_002805188"	0.817472	FALSE	H__sapiens__1_-712716	KIAA1367	Gene CPSF2	Q9P2I0	0.6
347	5	0	3	0	10	1	3	0	1	MmugDNA.41783.1.S1_at				12	ENSG00000163002	ENSP00000412554	129401	nucleoporin 35kDa	"46,765,546"	GeneID:706497	"54,231"	NUP35	"46,711,315"	+	17805	in gene	1	5_s5_208_Sirt1_Rh::1::21	-0.243356	H__sapiens__1_-711887	query	0.3	0.6	5_s5_208_Sirt1_Rh::1	10	"XP_001102848, XP_002798976"	NM_138285	NP_612142	"XM_001102848, XM_002798930"	0.783993	FALSE	H__sapiens__1_-711887		Gene NUP35	Q8NFH5	0.5
1627	3	0	3	0	10	1	1	0	1	MmuSTS.3547.1.S1_at				9	ENSG00000150275	ENSP00000484703	65217	protocadherin-related 15	"83,522,889"	GeneID:702413	"1,027,986"	PCDH15	"82,494,903"	+	790505	in gene	1	5_s5_208_Sirt1_Rh::1::105	-0.10281	H__sapiens__1_-710283	query	0.3	1	5_s5_208_Sirt1_Rh::1	10	"XP_001098443, XP_002805771, XP_002805772, XP_002805773, XP_002805774, XP_002805775, XP_002805776"	NM_033056	NP_149045	"XM_001098443, XM_002805725, XM_002805726, XM_002805727, XM_002805728, XM_002805729, XM_002805730"	0.902299	FALSE	H__sapiens__1_-710283	USH1F	Gene PCDH15	Q96QU1	0.3
247	6	0	5	0	17	1	4	0	1					11	ENSG00000123342	ENSP00000449752	4327	matrix metallopeptidase 19	"52,903,285"	GeneID:710111	"5,941"	MMP19	"52,897,344"	-	4341	in gene	1	5_s5_208_Sirt1_Rh::1::20	-0.23937	H__sapiens__1_-706354	query	0.29	0.83	5_s5_208_Sirt1_Rh::1	17	XP_001111542	NM_002429	NP_002420	XM_001111542	0.787123	FALSE	H__sapiens__1_-706354	RASI-1	Gene MMP19	Q99542	0.35
94	1	0	3	0	11	1	2	0	1	MmugDNA.32521.1.S1_s_at				2	ENSG00000136068	ENSP00000420213	2317	"filamin B, beta"	"78,388,213"	GeneID:702732	"167,431"	FLNB	"78,220,782"	-	82453	in gene	1	5_s5_208_Sirt1_Rh::1::72	-0.277333	H__sapiens__1_-708196	query	0.27	3	5_s5_208_Sirt1_Rh::1	11	XP_001097922	NM_001457	NP_001448	XM_001097922	0.757802	FALSE	H__sapiens__1_-708196	TABP	Gene FLNB	O75369	0.09
396	4	0	3	0	12	1	2	0	1	"MmugDNA.27974.1.S1_at, MmugDNA.27974.1.S1_s_at, MmugDNA.4613.1.S1_at, MmugDNA.4614.1.S1_at, MmugDNA.4616.1.S1_at, MmugDNA.4618.1.S1_s_at"				9	ENSG00000108100	ENSP00000473625	219771	cyclin Y	"35,776,693"	GeneID:698889	"222,998"	CCNY	"35,553,695"	+	83617	in gene	1	5_s5_208_Sirt1_Rh::1::104	-0.107151	H__sapiens__1_-704470	query	0.25	0.75	5_s5_208_Sirt1_Rh::1	12	"XP_001094187, XP_001093618"	NM_181698	NP_859049	"XM_001094187, XM_001093618"	0.89839	FALSE	H__sapiens__1_-704470	CBCP1	Gene CCNY	Q8ND76	0.33
316	5	0	3	0	13	1	2	0	1	"Mmu.5431.1.S1_at, MmugDNA.242.1.S1_at, MmugDNA.32505.1.S1_at, MmugDNA.33438.1.S1_at, MmugDNA.75.1.S1_at, MmugDNA.75.1.S1_x_at, MmuSTS.725.1.S1_at"				11	ENSG00000111726	ENSP00000446239	55907	cytidine monophosphate N-acetylneuraminic acid synthetase	"22,409,977"	GeneID:706604	"19,313"	CMAS	"22,390,664"	+	88	in gene	1	5_s5_208_Sirt1_Rh::1::17	-0.260177	H__sapiens__1_-704921	query	0.23	0.6	5_s5_208_Sirt1_Rh::1	13	XP_001099303	NM_018686	NP_061156	XM_001099303	0.770915	FALSE	H__sapiens__1_-704921		Gene CMAS	Q8NFW8	0.38
122	3	0	3	0	16	1	4	0	1	MmuSTS.798.1.S1_at				1	ENSG00000163159	ENSP00000357887	6944	vacuolar protein sorting 72 homolog (S. cerevisiae)	"129,618,227"	GeneID:709818	"16,851"	VPS72	"129,601,376"	-	26931	downstream	1	5_s5_208_Sirt1_Rh::1::6	-0.328597	H__sapiens__1_-711931	query	0.19	1	5_s5_208_Sirt1_Rh::1	16	XP_001104866	NM_005997	NP_005988	XM_001104866	0.719933	FALSE	H__sapiens__1_-711931	YL1	Gene VPS72	Q15906	0.19
207	3	0	3	0	16	1	4	0	1	"MmugDNA.33723.1.S1_at, MmuSTS.749.1.S1_at"				1	ENSG00000163157	ENSP00000468489	29765	tropomodulin 4 (muscle)	"129,601,143"	GeneID:709732	"16,289"	TMOD4	"129,584,854"	-	9847	in gene	1	5_s5_208_Sirt1_Rh::1::6	-0.074373	H__sapiens__1_-711930	query	0.19	1	5_s5_208_Sirt1_Rh::1	16	"XP_001104793, XP_002801814"	NM_013353	NP_037485	"XM_002801768, XM_001104793"	0.928325	FALSE	H__sapiens__1_-711930	Sk-Tmod	Gene TMOD4	Q9NZQ9	0.19
293	4	0	2	0	16	1	4	0	1					19	ENSG00000142534	ENSP00000471874	6205	ribosomal protein S11	"55,763,952"	GeneID:718844	"37,076"	RPS11	"55,726,876"	+	33380	in gene	1	5_s5_208_Sirt1_Rh::1::65	-0.341107	H__sapiens__1_-709238	query	0.13	0.5	5_s5_208_Sirt1_Rh::1	16	"XP_001115152, XP_001115123, XP_002801393, XP_002801394"	NM_001015	NP_001006	"XM_001115152, XM_001115123, XM_002801347, XM_002801348"	0.710982	FALSE	H__sapiens__1_-709238	S11	Gene RPS11	P62280	0.25
294	4	0	2	0	16	1	4	0	1	"Mmu.12206.3.S1_at, Mmu.12206.3.S1_x_at, MmugDNA.16774.1.S1_s_at"				19	ENSG00000142541	ENSP00000485546	23521	ribosomal protein L13A	"55,754,045"	GeneID:574314	"28,157"	RPL13A	"55,725,888"	+	34368	downstream	1	5_s5_208_Sirt1_Rh::1::65	-0.193961	H__sapiens__1_-709241	query	0.13	0.5	5_s5_208_Sirt1_Rh::1	16	"XP_001115079, XP_002801390, XP_002801391, XP_002801392"	NM_012423	NP_036555	"XM_002801344, XM_001115079, XM_002801345, XM_002801346"	0.82369	FALSE	H__sapiens__1_-709241	TSTA1	Gene RPL13A	P40429	0.25
584															ENSG00000121957	ENSP00000408664	29899					GPSM2							-3.92451	H__sapiens__1_-706202	result						NM_013296	NP_037428		0.0197518	FALSE	H__sapiens__1_-706202	Pins		P81274
355															ENSG00000111087	ENSP00000441006	2735					GLI1							-3.94977	H__sapiens__1_-704825	result						NM_005269	NP_005260		0.0192591	FALSE	H__sapiens__1_-704825	GLI		P08151
183															ENSG00000100811	ENSP00000452225	7528					YY1							-3.75192	H__sapiens__1_-703366	result						NM_003403	NP_003394		0.0234727	FALSE	H__sapiens__1_-703366	YIN-YANG-1		P25490
185															ENSG00000134324	ENSP00000413714	23175					LPIN1							-3.92183	H__sapiens__1_-707871	result						NM_145693	NP_663731		0.0198049	FALSE	H__sapiens__1_-707871	KIAA0188		Q14693
191												nuclear export|nucleic acid transport|establishment of RNA localization|RNA export from nucleus|nucleocytoplasmic transport|nuclear speck|RNA transport|RNA localization|nuclear transport	GO:0051168|GO:0050657|GO:0051236|GO:0006405|GO:0006913|GO:0016607|GO:0050658|GO:0006403|GO:0051169		ENSG00000160201	ENSP00000489632	7307					U2AF1							-3.96617	H__sapiens__1_-711439	result						NM_006758	NP_006749		0.0189458	FALSE	H__sapiens__1_-711439	U2AFBP		Q01081
